# Supplementary material
Source: PubMed Central journal article supplement (PMC7572607)
Supplement: NIHMS1610956-supplement-Supplementary_Table_1.pdf [file NIHMS1610956-supplement-Supplementary_Table_1.pdf]

**Supplementary Table 1.** Characteristics of transgenic mice used in this study.

| Transgenic mouse line | Genotype | Sex | Mouse # | Age (months)       | CAG repeat size(s) |
|-----------------------|----------|-----|---------|--------------------|--------------------|
| YACMJD84.2            | Q84/Q84  | F   | *       | 12                 | ND                 |
|                       |          |     | *       | 10                 | ND                 |
|                       |          |     | 1       | 12                 | ND                 |
|                       |          |     | 2       | 11                 | <b>70/74/80/87</b> |
|                       |          |     | 3       | 14                 | <b>75</b>          |
|                       |          |     | 4       | 17                 | <b>70/74/77/80</b> |
|                       |          | 5   | 15      | <b>70/74/77/80</b> |                    |
|                       |          | 6   | 16      | ND                 |                    |
|                       |          | 7   | 9       | <b>71/77</b>       |                    |
|                       |          | 8   | 14      | <b>72/78</b>       |                    |
|                       |          | 9   | 13      | <b>73/77</b>       |                    |
|                       |          | 10  | 15      | <b>70/73/77/81</b> |                    |
|                       | M        | 11  | 15      | <b>69/75/76/82</b> |                    |
|                       |          | 12  | 12      | <b>70/74/83</b>    |                    |
|                       |          | 13  | 11      |                    |                    |
|                       |          | 14  | 12      |                    |                    |
|                       |          | 15  | 18      |                    |                    |
|                       |          | 16  | 12      |                    |                    |
|                       | wt       | F   | 17      | 16                 |                    |
|                       |          |     | 18      | 12                 | NA                 |
|                       |          |     | 19      | 15                 |                    |
|                       |          |     | 20      | 13                 |                    |
|                       |          | M   | 21      | 13                 |                    |
| 22                    |          |     | 15      |                    |                    |
| 23                    |          |     | 14      |                    |                    |
| CMVMJD135             | Q135     | F   | 24      | 16                 | <b>129</b>         |
|                       |          |     | 25      | 16                 | <b>127</b>         |
|                       |          |     | 26      | 16                 | <b>127</b>         |
|                       |          | *   | 16      | <b>ND</b>          |                    |
|                       |          | *   | 15      | <b>ND</b>          |                    |
|                       |          | 27  | 16      | <b>129</b>         |                    |
|                       | M        | 28  | 16      | <b>125</b>         |                    |
|                       |          | 29  | 15      | <b>129</b>         |                    |
|                       |          | 30  | 8       | <b>129</b>         |                    |
|                       |          | 31  | 16      |                    |                    |
| wt                    | F        | 32  | 16      |                    |                    |
|                       |          | 33  | 16      |                    |                    |
|                       |          | 34  | 16      |                    |                    |
|                       |          | 35  | 10      | NA                 |                    |
|                       | M        | *   | 16      |                    |                    |
|                       |          | 36  | 16      |                    |                    |
|                       |          | 37  | 16      |                    |                    |

Q84/Q84, homozygous YACMJD84.2; Q135, hemizygous CMVMJD135; F, Female; M, Male; NA, Not Applicable; ND, Not Determined; \*, mouse eliminated from analysis due to detection of high levels of Glutamine; main transgene CAG repeat size is represented in bold.
