# Supplementary material
Source: PubMed Central journal article supplement (PMC7572607)
Supplement: NIHMS1610956-supplement-Supplementary_Table_2.pdf [file NIHMS1610956-supplement-Supplementary_Table_2.pdf]

**Supplementary Table 2.** Demographic information for postmortem human samples of cerebellar cortex used in this study.

| Health condition           | Sex      | Sample | Age at death (yo) | Cause of death        | CAG repeat sizes |
|----------------------------|----------|--------|-------------------|-----------------------|------------------|
| <b>Control individuals</b> | <b>F</b> | C2     | 48                | polycythemia vera     | 12/25            |
|                            |          | C3     | 83                | renal cell carcinoma  | 12/19            |
|                            | <b>M</b> | C1     | 59                | sudden cardiac arrest | 18/21            |
|                            |          | C4     | 61                | cardiac failure       | 21/25            |
|                            |          | C5     | 73                | respiratory failure   | 25/28            |
| <b>Patients with SCA3</b>  | <b>F</b> | P1     | 59                | SCA3-related          | 21/70            |
|                            |          | P2     | 84                |                       | 21/66            |
|                            |          | P3     | 48                |                       | 22/73            |
|                            |          | P4     | 75                |                       | 19/69            |
|                            | <b>M</b> | P5     | 49                |                       | 12/73            |
|                            |          | P6     | 59                |                       | NA/72            |

F, Female; M, Male; yo, years old; NA, not available
