# Supplementary material
Source: PubMed Central journal article supplement (PMC7572607)
Supplement: NIHMS1610956-supplement-Supplementary_Table_3.pdf [file NIHMS1610956-supplement-Supplementary_Table_3.pdf]

**Supplementary Table 3.** Liver profile of Q84/Q84 transgenic mice and littermate controls used in the MRS study.

| genotype         | mean $\pm$ SEM |                 |                   |                            |                 |                 |               |                 |
|------------------|----------------|-----------------|-------------------|----------------------------|-----------------|-----------------|---------------|-----------------|
|                  | ALB<br>g/dL    | ALP<br>U/L      | ALT<br>U/L        | BA<br>$\mu$ mol/L          | BUN<br>mg/dL    | CHOL<br>mg/dL   | GGT<br>U/L    | TBIL<br>mg/dL   |
| wt<br>(N=4)      | 2.9 $\pm$ 0.2  | 58.3 $\pm$ 14.6 | 146.5 $\pm$ 105.8 | 1.0 $\pm$ 0.0 <sup>#</sup> | 20.75 $\pm$ 1.3 | 71.3 $\pm$ 16.8 | 3.8 $\pm$ 1.3 | 0.43 $\pm$ 0.06 |
| Q84/Q84<br>(N=5) | 2.0 $\pm$ 0.3  | 55.4 $\pm$ 13.5 | 151.2 $\pm$ 72.8  | 5.0 $\pm$ 1.3              | 25.4 $\pm$ 2.0  | 91.8 $\pm$ 10.0 | 4.0 $\pm$ 1.0 | 0.38 $\pm$ 0.07 |

ALB, albumin; ALP, alkaline phosphatase; ALT, alanine aminotransferase; BA, bile acids; BUN, blood urea nitrogen; CHOL, total cholesterol; GGT, gamma glutamyl transferase; SEM, standard error of the mean; <sup>#</sup> excludes the value from one mouse with BA >250  $\mu$ mol/L
