# Supplementary material
Source: PubMed Central journal article supplement (PMC7572607)

**A****FEMALES**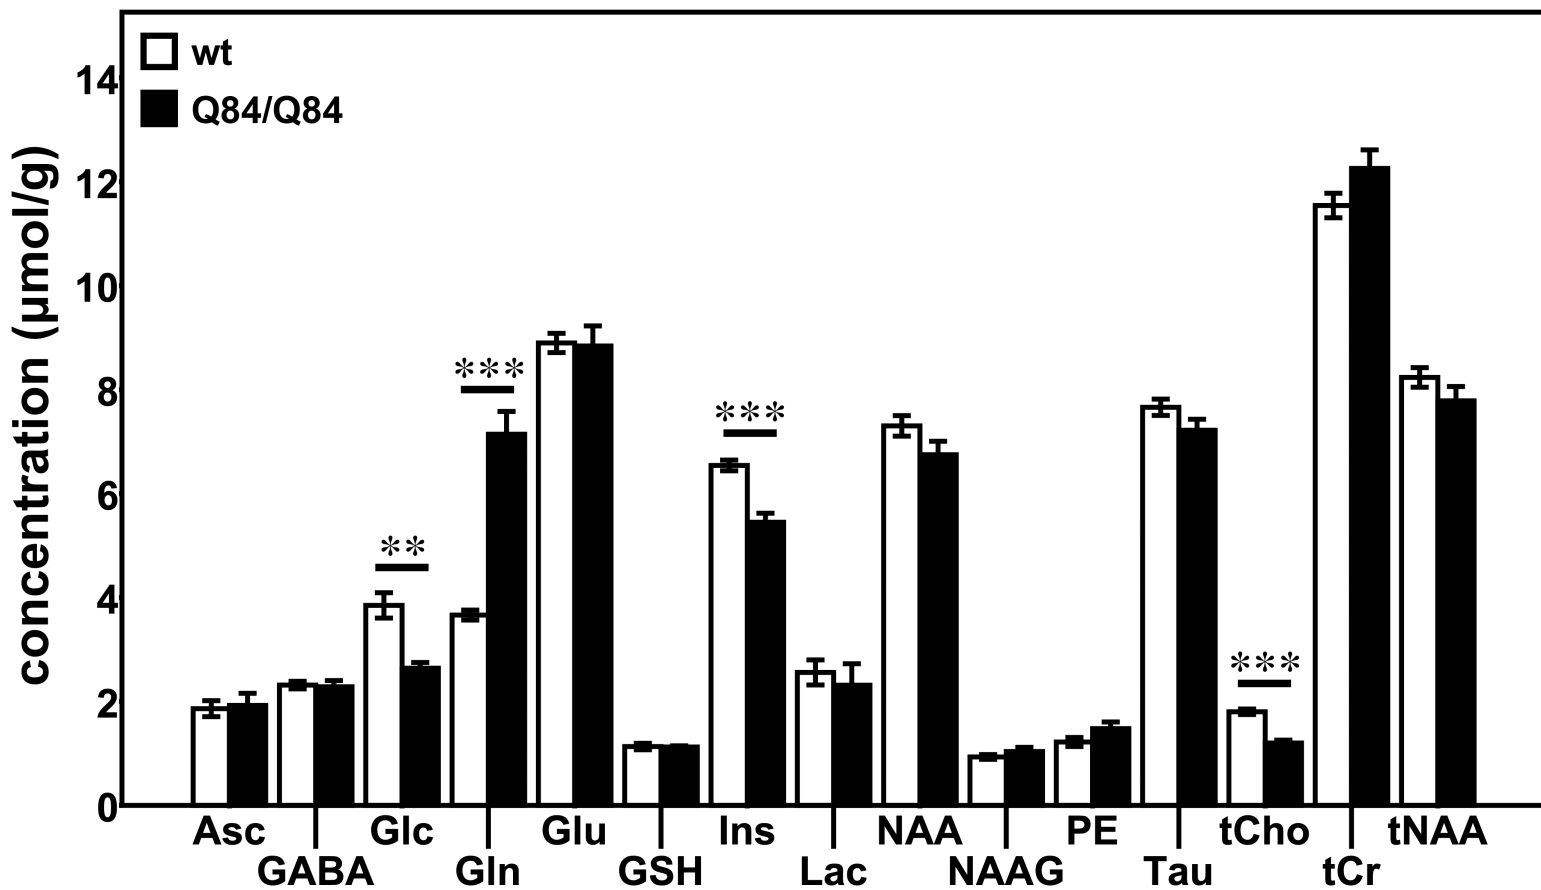**B****MALES**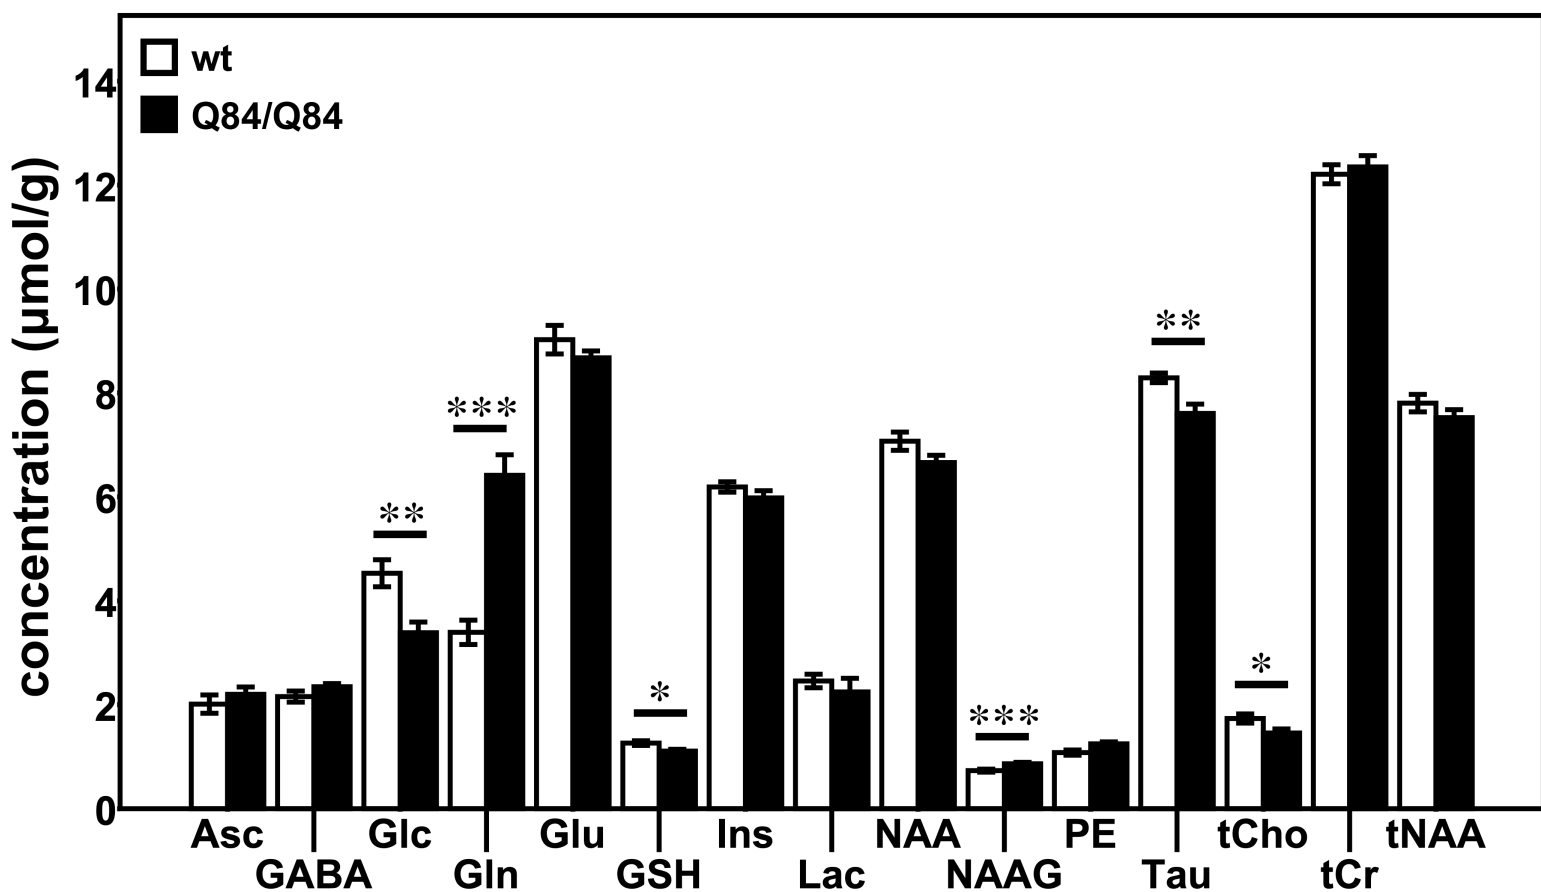

Supplement: NIHMS1610956-supplement-Supplementary_Figure_1.pdf [file NIHMS1610956-supplement-Supplementary_Figure_1.pdf]

**A****FEMALES**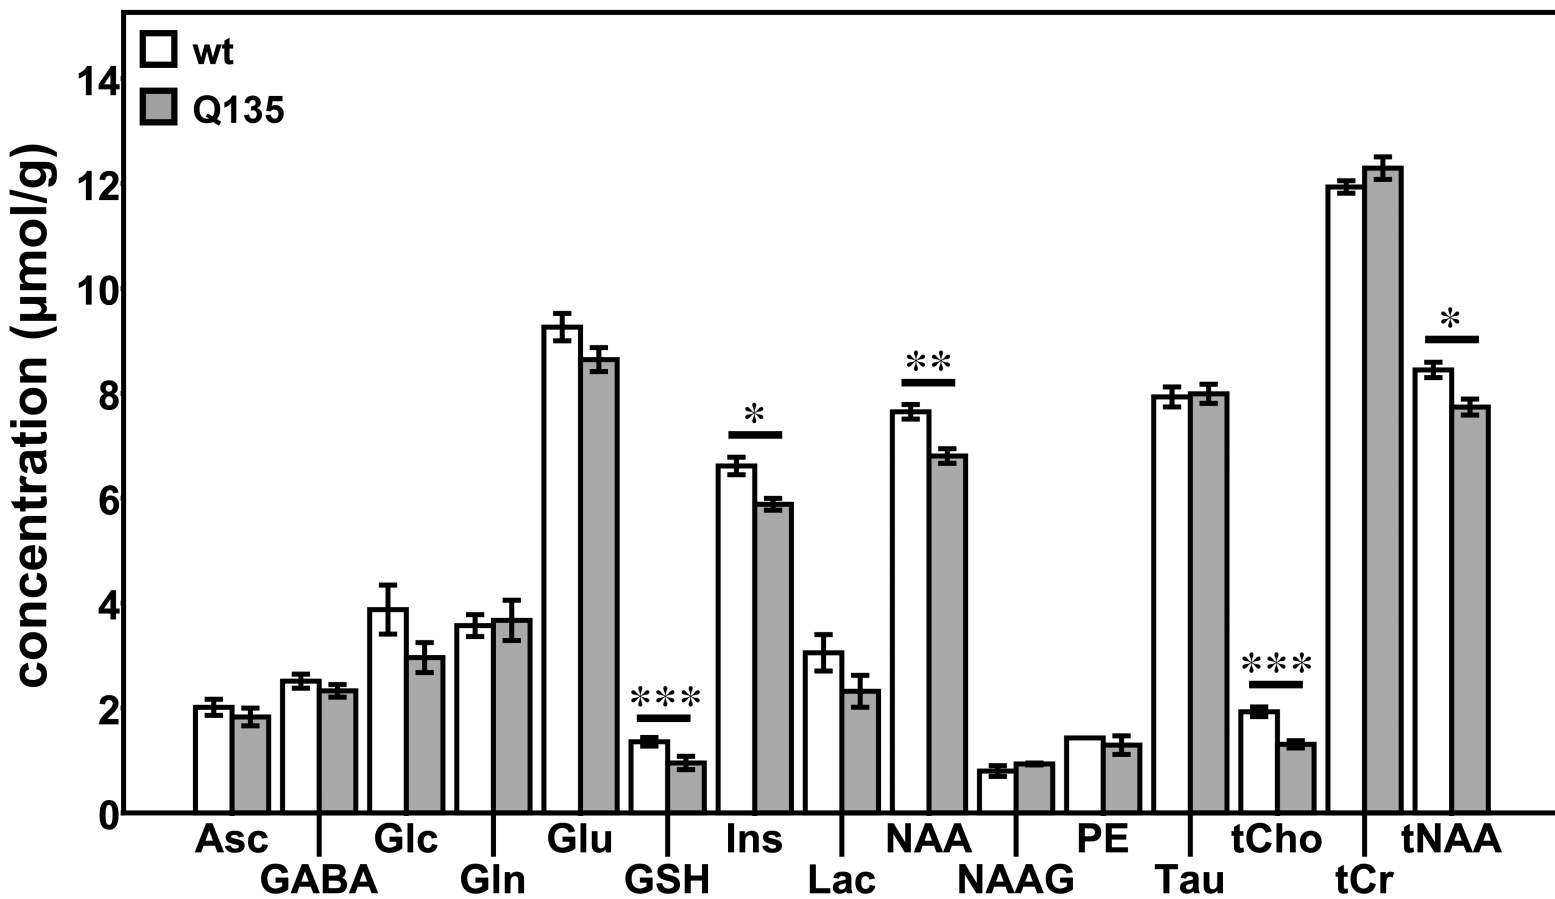**B****MALES**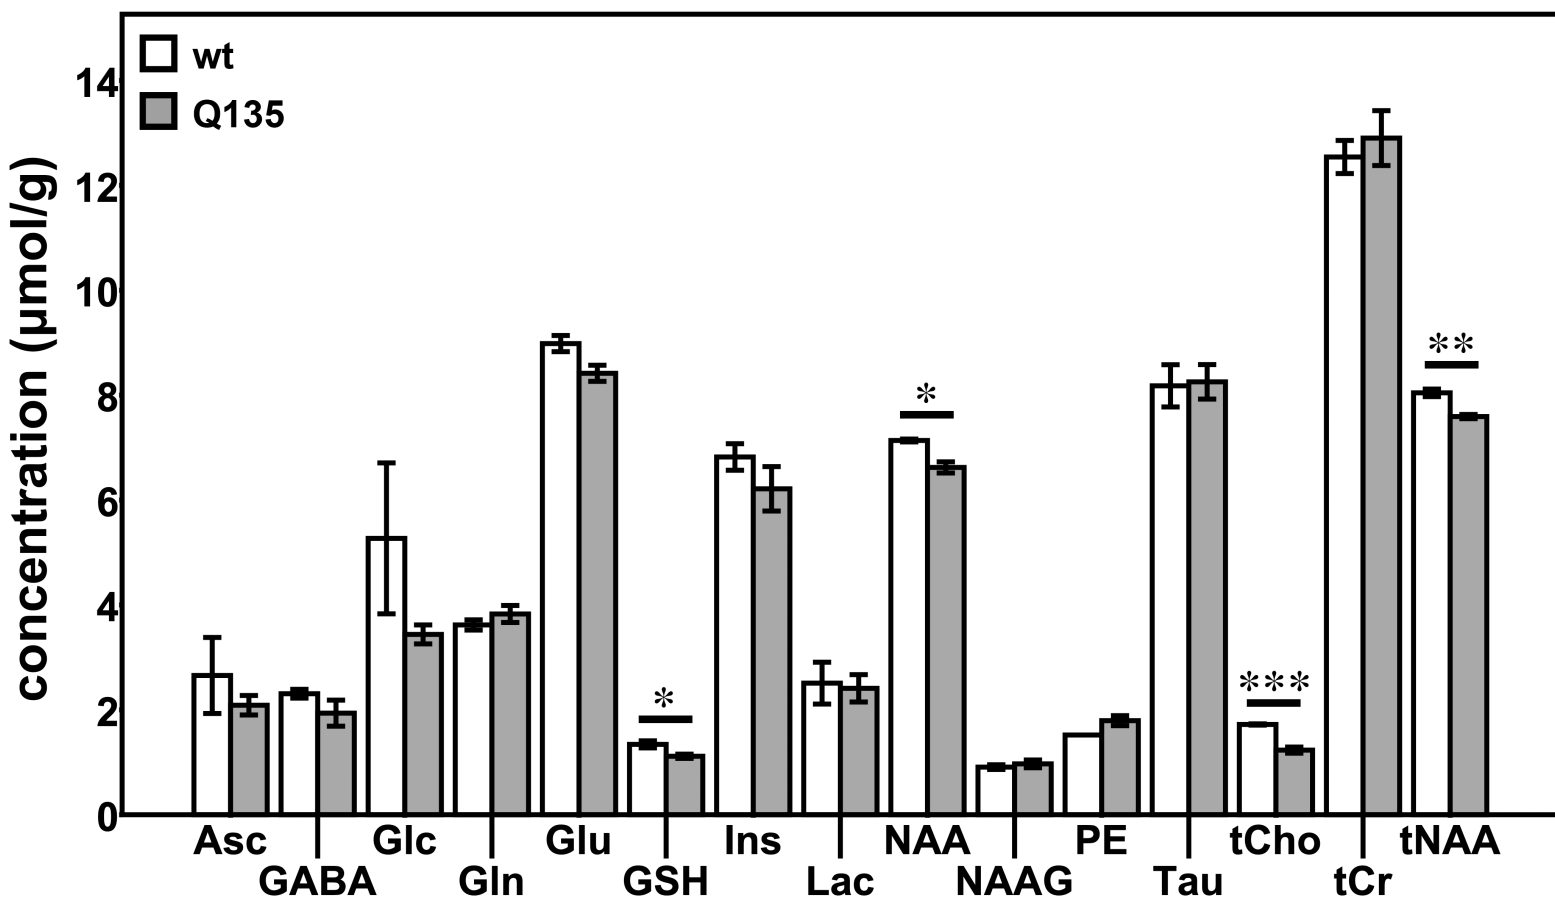

Supplement: NIHMS1610956-supplement-Supplementary_Figure_2.pdf [file NIHMS1610956-supplement-Supplementary_Figure_2.pdf]

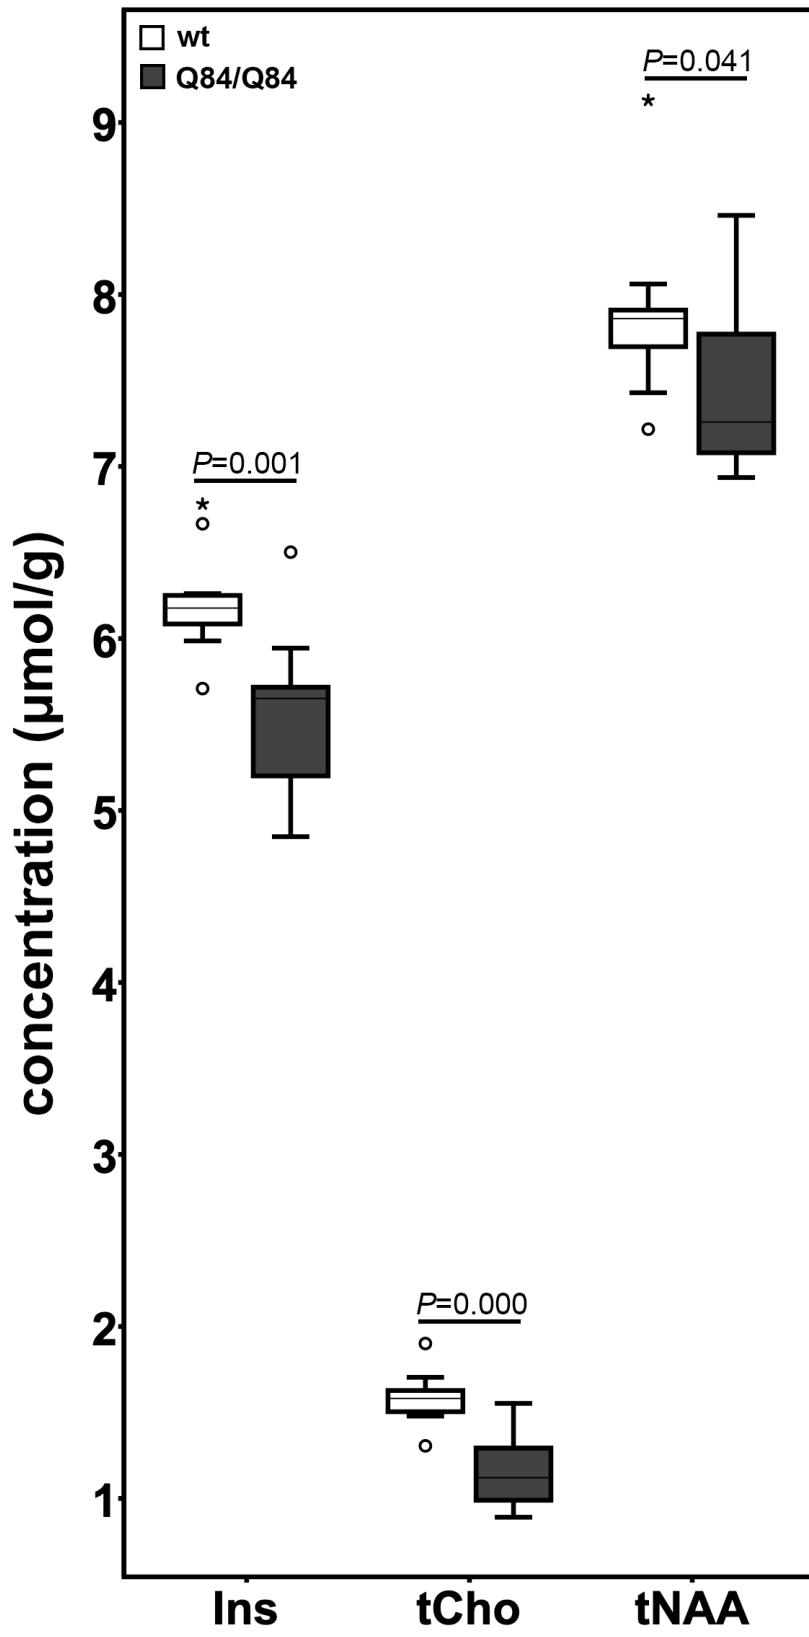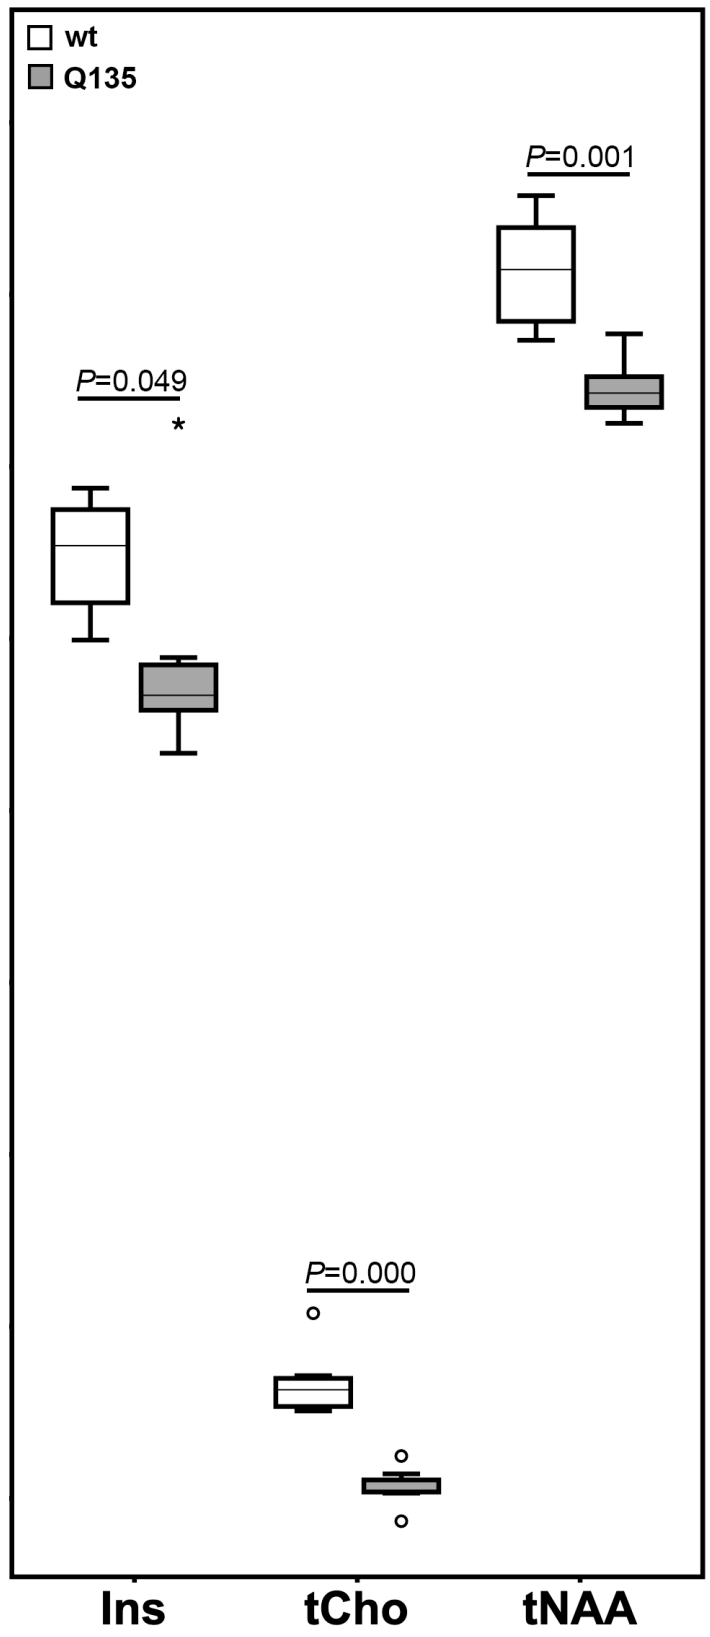

Supplement: NIHMS1610956-supplement-Supplementary_Figure_3.pdf [file NIHMS1610956-supplement-Supplementary_Figure_3.pdf]

**A**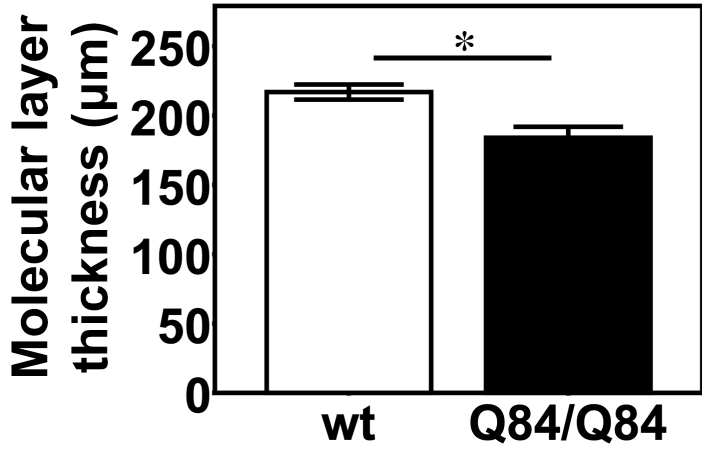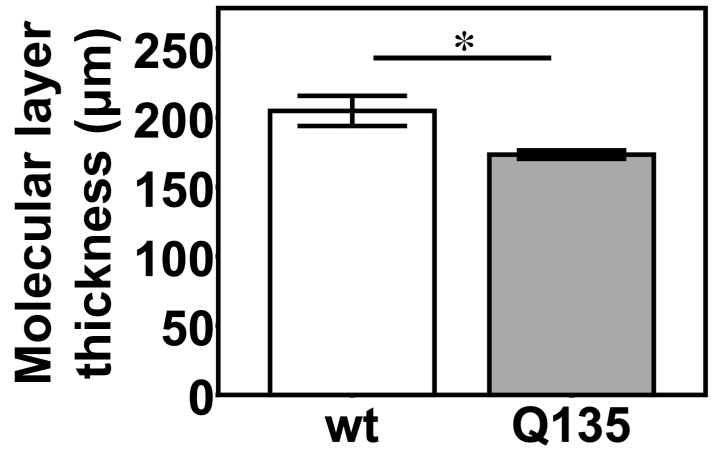**B**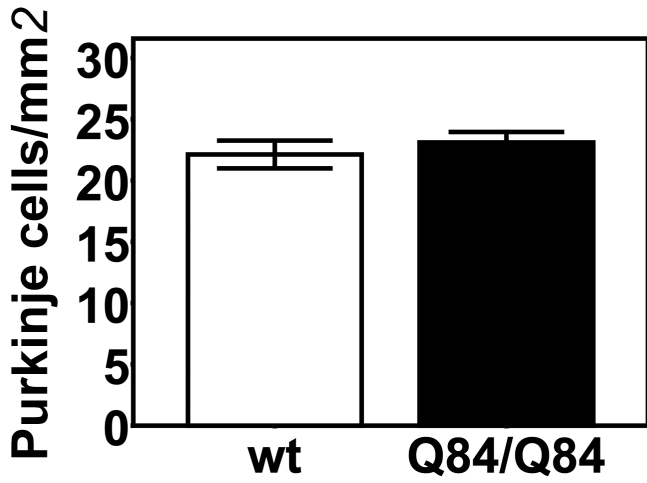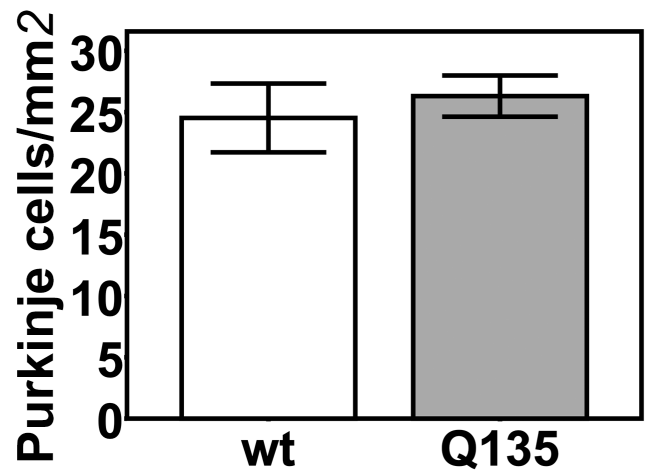

Supplement: NIHMS1610956-supplement-Supplementary_Figure_4.pdf [file NIHMS1610956-supplement-Supplementary_Figure_4.pdf]

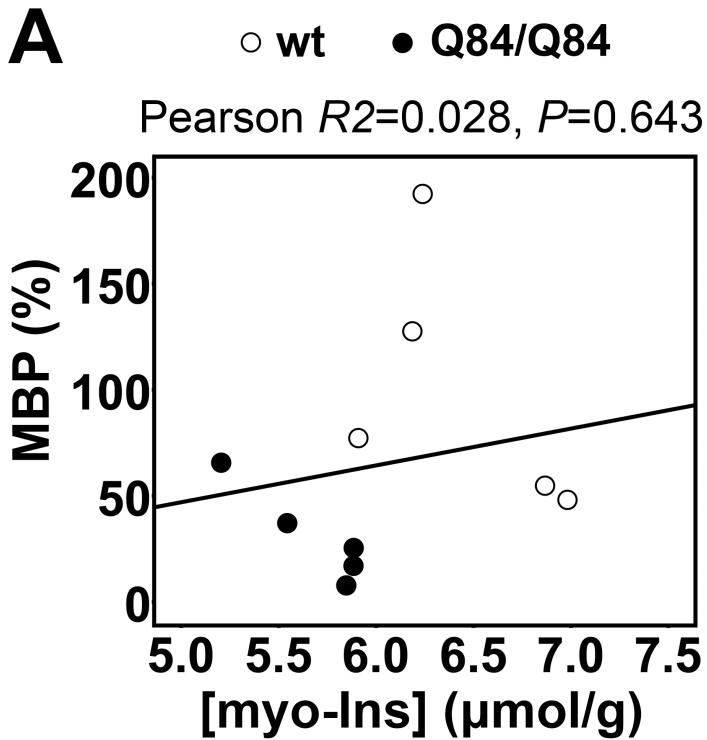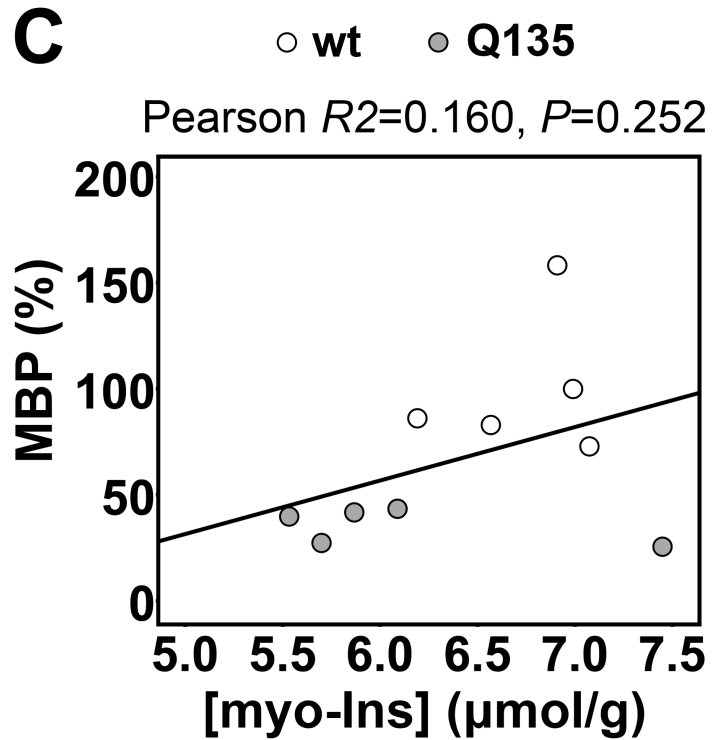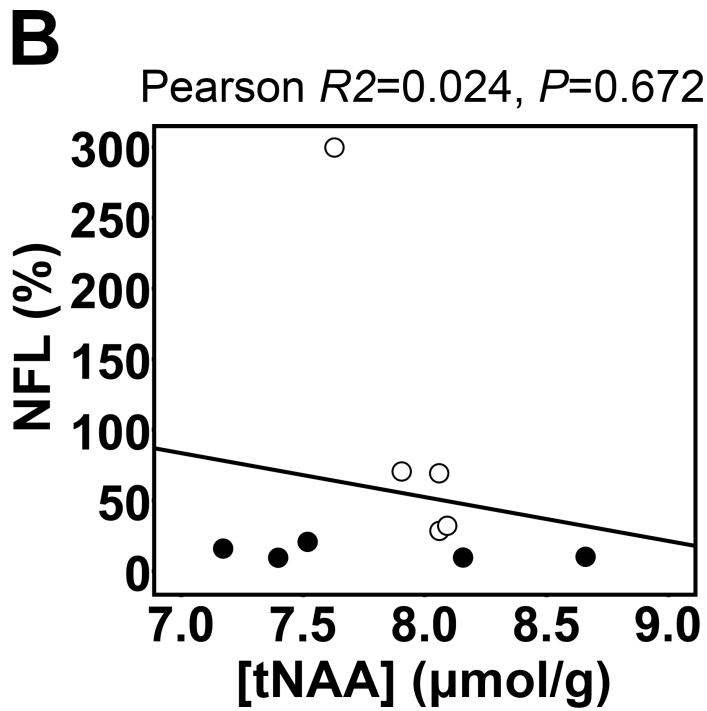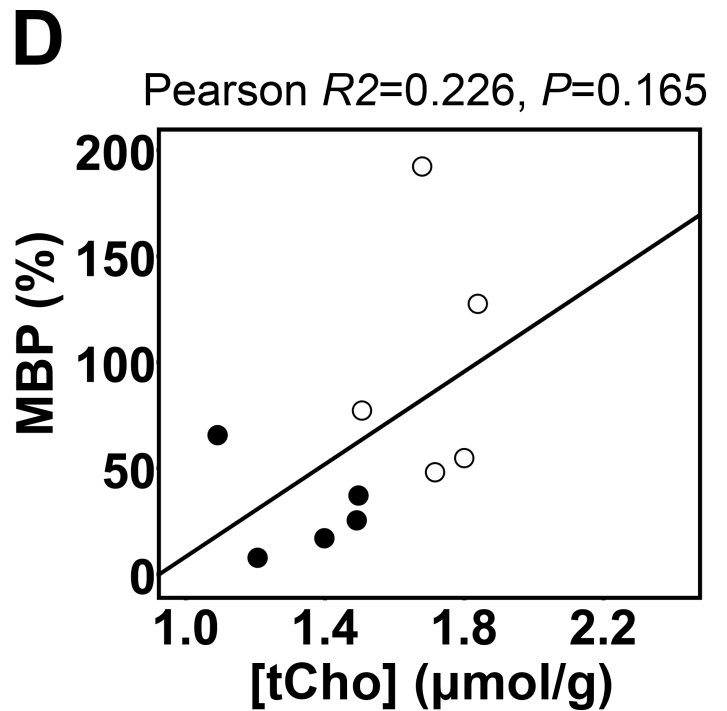

Supplement: NIHMS1610956-supplement-Supplementary_Figure_5.pdf [file NIHMS1610956-supplement-Supplementary_Figure_5.pdf]
